# Supplementary material
Source: Research Square preprint supplement (doi:10.21203/rs.3.rs-8736268/v1)
Supplement: Supplementary file 1 [file fe5d4533e2fa5868b200dc89.doc]

Table 1.

Demographic information of children and families (N:60)

| Variable | NH Children  Mean  **±** SD | |  | HA Children  Mean± SD | |
| --- | --- | --- | --- | --- | --- |
| Children age (mounth)  Mothers age average  Father age average  HL diagnosis age / year  HA usage time / year  Starting age/year in special education  Degree of HL (Left ear)  Mild HL  Moderate HL  Severe HL  Profound HL  Language impairment grades  Very poor  Poor  Below average  Average  Above average    Mother's educational status  Primary education  High school  University  Gender Females  Males | | 69.9 ± 11.05  36.4 ± 4.2  39.3 + 5.0  -  -  -  N %  - -  - -  - -  - -  - -  - -  4 13.3  25 83.3  1 3.3  2 6.7  13 43.3  15 50.0  17 56.7  13 43.3 |  | | 70.6 ± 13.2  33.5 ± 5.8  37.9 ± 6.5  1.07 ± 1.15  3.6 ± 1.26  2.1 ± 1.43  N %  2 6.7  16 53.3  11 36.7  1 3.3  4 13.3  5 16.7  10 33.3  11 36.7  - -  14 46.7  6 20.0  10 33.3  17 56.7  13 43.3 |

**HA:** Hearing Aid. **NH:** Normal Hearing. **HL:** Hearing Loss.

Table 2.

T-test results of TEDIL and MLU, NDW , TNW scores of the children in the research group

Gruops N Mean SD p

| TEDIL-Receptive Language scores  TEDIL-Expressive Language scores  ENNI  A1 Story  MLU A2 Story  A3 Story  A1 Story  NDW A2 Story  A3 Story  A1 Story  TNW A2 Story  A3 Story | HA  NH  HA  NH  HA  NH  HA  NH  HA  NH  HA  NH  HA  NH  HA  NH  HA  NH  HA  NH  HA  NH | 30  30  30  30  30  30  30  30  30  30  30  30  30  30  30  30  30  30  30  30  30  30 | 87.87  99.00  87.46  97.70  5.74  8.26  5.63  8.76  6.17  9.15  18.56  33.50  27.30  49.96  33.76  61.56  31.30  72.46  50.00  107.36  79.90  181.03 | 11.78  7.72  12.42  7.58  1.45  1.85  1.39  1.34  1.39  1.57  8.85  9.20  9.22  10.24  11.39  13.97  15.23  25.01  21.59  36.75  28.77  64.90 | .000*  .000*  .000*  .000*  .000*  .000*  .000*  .000*  .000*  .000*  .000* |
| --- | --- | --- | --- | --- | --- |

*p<.05

**HA:** Hearing Aid. **NH:** Normal Hearing. **MLU:** Mean Length of Utterance. **NDW:** Number of Different Words. **TNW:**  Total Number of Words.

Table 3

The results of the TEDIL scores according to the Mann-Whitney U test of the groups in the HA group according to gender.

Gruops Gender N Mean rank Sum of rank U p

| TEDIL-HA  Receptive language  Expressive language | Females  Males  Females  Males | 17  13  17  13 | 15.32  15.73  13.71  17.85 | 260.50  204.50  233.00  232.00 | 107.50  80.00 |  | .902  .213 |
| --- | --- | --- | --- | --- | --- | --- | --- |
| ENNI-HA  A1 Story  MLU A2 Story    A3 Story | Females  Males  Females  Males  Females  Males | 17  13  17  13  17  13 | 18.79  11.19  17.26  13.19  18.44  11.65 | 319.50  145.50  293.50  171.50  313.50  151.50 | 54.50  80.50  60.50 |  | .017*  .213  .035* |
| ENNI-HA  A1 Story  NDW A2 Story  A3 Story | Females  Males  Females  Males  Females  Males | 17  13  17  13  17  13 | 4.26  17.12  15.85  15.04  14.82  16.38 | 302.00  162.00  284.50  180.50  267.00  198.00 | 72.00  89.50  107.00 |  | .113  .385  .902 |
| ENNI-HA  A1 Story  NDW A2 Story  A3 Story | Females  Males  Females  Males  Females  Males | 17  13  17  13  17  13 | 14.26  17.12  15.85  15.04  14.82  16.38 | 242.50  222.50  269.50  195.50  252.50  213.00 | 89.50  104.50  99.00 |  | .385  .805  .650 |

*p<.05

**HA:** Hearing Aid. **NH:** Normal Heairng **MLU:** Mean Length of Utterance. **NDW:** Number of Different Words. **TNW:**  Total Number of Words.

Table 4.

The results of the A history MLU, NDW, TNW scores according to the Mann-Whitney U test of the groups in th e research group according to gender

Gruops Gender N Mean Rank Sum of Runk U p

| TEDIL-NH  Receptive language  Expressive language | Females  Males  Females  Males | 17  13  17  13 | 18.32  11.81  16.44  14.27 | 311.50  153.50  279.50  185.50 | 62.50  94.50 |  | .043*  .509 |
| --- | --- | --- | --- | --- | --- | --- | --- |
| ENNI-NH  A1 Story  MLU A2 Story  A3 Story | Females  Males  Females  Males  Females  Males | 17  13  17  13  17  13 | 18.29  11.85  19.50  10.27  17.65  12.69 | 311.15  154.00  331.50  133.50  300.00  165.00 | 63.00  42.50    74.00 |  | .048*  .003*  .133 |
| ENNI-NH  A1 Story  NDW A2 Story  A3 Story | Females  Males  Females  Males  Females  Males | 17  13  17  13  17  13 | 14.26  17.12  15.85  15.04  14.82  16.38 | 242.50  222.50  269.50  195.50  252.50  213.00 | 89.50  104.50  99.00 |  | .385  .805  .650 |
| ENNI-NH  A1 Story  TNW A2 Story  A3 Story | Females  Males  Females  Males  Females  Males | 17  13  17  13  17  13 | 15.03  16.12  15.38  15.65  14.38  16.96 | 255.50  209.50  261.50  203.50  244.50  220.50 | 102.50    108.50  91.50 |  | .742  .934  .432 |

*p<.05

**NH:** Normal Heairng **MLU:**  Mean Length of Utterance. **NDW:** Number of Different Words. **TNW:**  Total Number of Words.

Table 5.

Logistic Regression Table

|  |  |  |  |  |  | **95.0%C.I.for** | **EXP (B)** |
| --- | --- | --- | --- | --- | --- | --- | --- |
| **Variable** |  | B | SE | Odds ratio | p | Lower | Upper |
| **TELD** | Receptive language | .081 | .039 | 4.235 | .040 | 1.004 | 1.171 |
|  | Expressive language | .052 | .039 | 1.791 | .181 | .976 | 1.136 |
|  | Constant | -12.398 | 3.606 | 11.819 | .001 |  |  |
| **A1 Story** | MLU | .710 | .310 | 5.230 | .022 | 1.107 | 3.737 |
|  | NDW | -.149 | .117 | 1.639 | .200 | .685 | 1.083 |
|  | TNW | .142 | .058 | 5.886 | .015 | 1.028 | 1.292 |
|  | Constant | -7.967 | 2.263 | 12.396 | .000 |  |  |
| **A3 Story** | MLU | 1.976 | .893 | 4.892 | .027 | 1.252 | 41.540 |
|  | NDW | .093 | .111 | .708 | .400 | .883 | 1.365 |
|  | TNW | .033 | .033 | .976 | .323 | .968 | 1.104 |
|  | Constant | -24.093 | 8.803 | 7.490 | .006 |  |  |

**MLU:**  Mean Length of Utterance. **NDW:** Number of Different Words .**TNW:** Total Number of Words
